# Supplementary material
Source: MDPI journal article supplement (https://www.mdpi.com/2072-4292/12/20/3389)
Supplement: s1 [file s1]

# Novel Credal Decision Tree-based ensemble approaches for predicting the landslide susceptibility

Alireza Arabameri <sup>1</sup>, Ebrahim Karimi-Sangchini <sup>2</sup>, Subodh Chandra Pal <sup>3</sup>, Asish Saha <sup>3</sup>, Indrajit Chowdhuri <sup>3</sup>, Saro Lee <sup>4,5\*</sup> and Dieu Tien Bui <sup>6</sup>

<sup>1</sup> Department of Geomorphology, Tarbiat Modares University, Tehran 14117-13116, Iran;

a.arabameri@modares.ac.ir (A.A)

<sup>2</sup> Assistant Professor, Soil Conservation and Watershed Management Research Department, Lorestan Agricultural and Natural Resources Research and Education Center, AREEO, Khorramabad, Iran; e.karimi64@gmail.com (E.K.S.)

<sup>3</sup> Department of Geography, The University of Burdwan, West Bengal, India; scpal@geo.buruniv.ac.in (S.C.P.); asishsaha01@gmail.com (A.S.), indrajitchowdhuri@gmail.com (I.C.)

<sup>4</sup> Geoscience Platform Research Division, Korea Institute of Geoscience and Mineral Resources (KIGAM), 124, Gwahak-ro Yuseong-gu, Daejeon 34132, Korea

<sup>5</sup> Korea University of Science and Technology, 217 Gajeong-ro Yuseong-gu, Daejeon 34113, Korea

<sup>6</sup> Institute of Research and Development, Duy Tan University, Da Nang 550000, Vietnam.

buitiendieu@duytan.edu.vn (D.T.B)

\* Correspondence: leesaro@kigam.re.kr(S.L.)

Received: 16 September 2020; Accepted: 08 October 2020; Published: date

## Section 1

**Table 1.** Abbreviation and their respective description of several lithological units present in the study area.

| Unit   | Description                                                                                                                    |
|--------|--------------------------------------------------------------------------------------------------------------------------------|
| Ebv    | Basaltic volcanic rocks                                                                                                        |
| Ek     | Well bedded green tuff and tuffaceous shale ( KARAJ FM )                                                                       |
| Cm     | Dark grey to black fossiliferous limestone with subordinate black shale ( MOBARAK FM )                                         |
| Odi    | Diorite                                                                                                                        |
| pC-C   | Late proterozoic - early Cambrian undifferentiated rocks                                                                       |
| Pgkc   | Light-red coarse grained, polygenic conglomerate with sandstone intercalations                                                 |
| Ea.bv  | Andesitic and basaltic volcanics                                                                                               |
| Eky    | Gypsum                                                                                                                         |
| Eavt   | Andesitic volcanic tuff                                                                                                        |
| Mm,s,l | Marl, calcareous sandstone, sandy limestone and minor conglomerate                                                             |
| Qft1   | High level piedmont fan and vally terrace deposits                                                                             |
| Jl     | Light grey, thin - bedded to massive limestone ( LAR FM )                                                                      |
| pCk    | Dull green grey slaty shales with subordinate intercalation of quartzitic sandstone ( KAHAR FM ; Morad series and Kalmard Fm ) |
| TRJs   | Dark grey shale and sandstone ( SHEMSHAK FM. )                                                                                 |
| pC-Cs  | Thick dolomite and limestone unit, portly cherty with thick shale intercalations ( SOLTANIEH FM )                              |
| COm    | Dolomite platy and flaggy limestone containing trilobite ; sandstone and shale ( MILA FM )                                     |
| PeEz   | Reef-type limestone and gypsiferous marl (ZIARAT FM )                                                                          |
| P      | Undifferentiated Permian rocks                                                                                                 |
| Pr     | Dark grey medium - bedded to massive limestone ( RUTEH LIMESTONE )                                                             |

Source: Geological Society of Iran (GSI)

**Section 2: Several gully erosion conditioning factors**

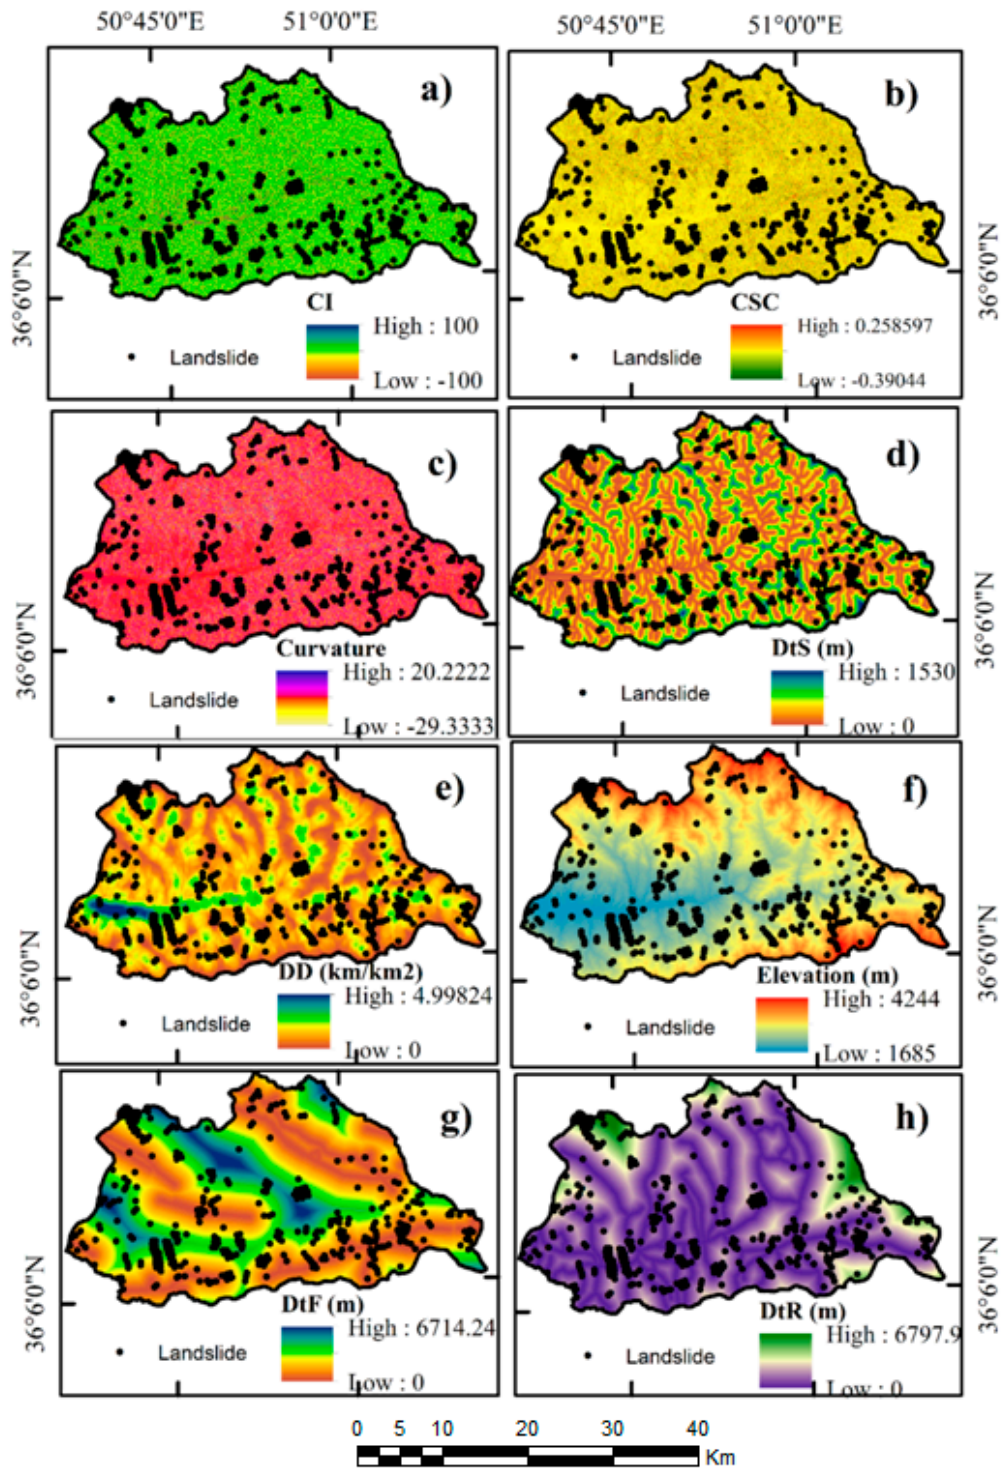

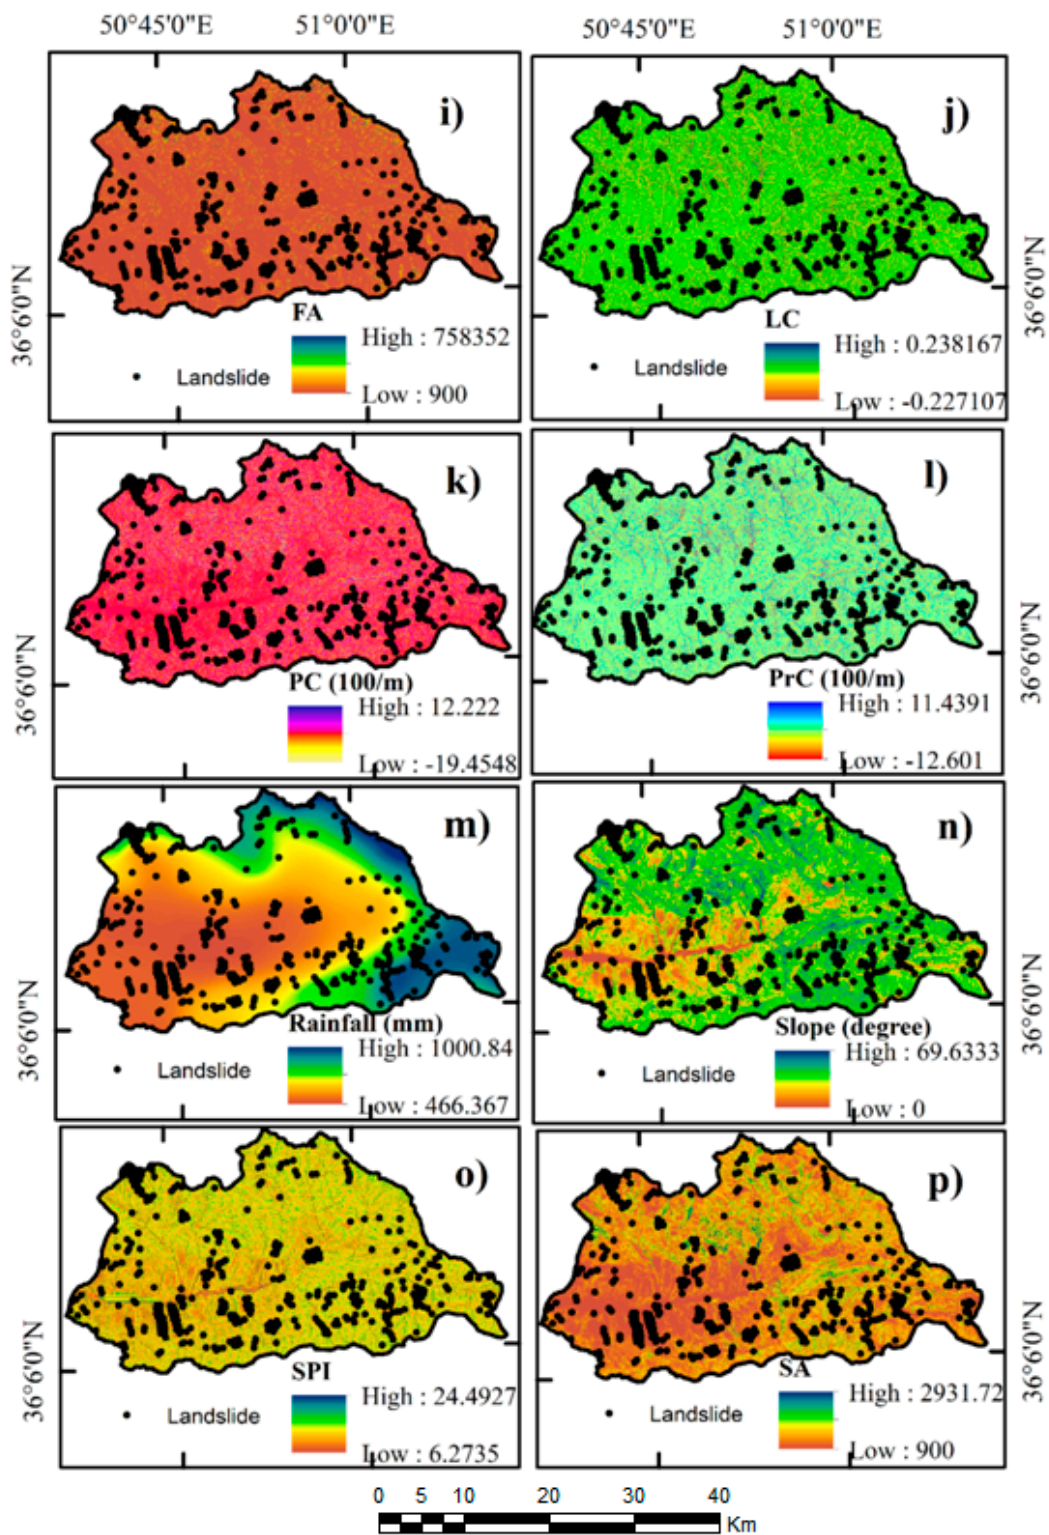

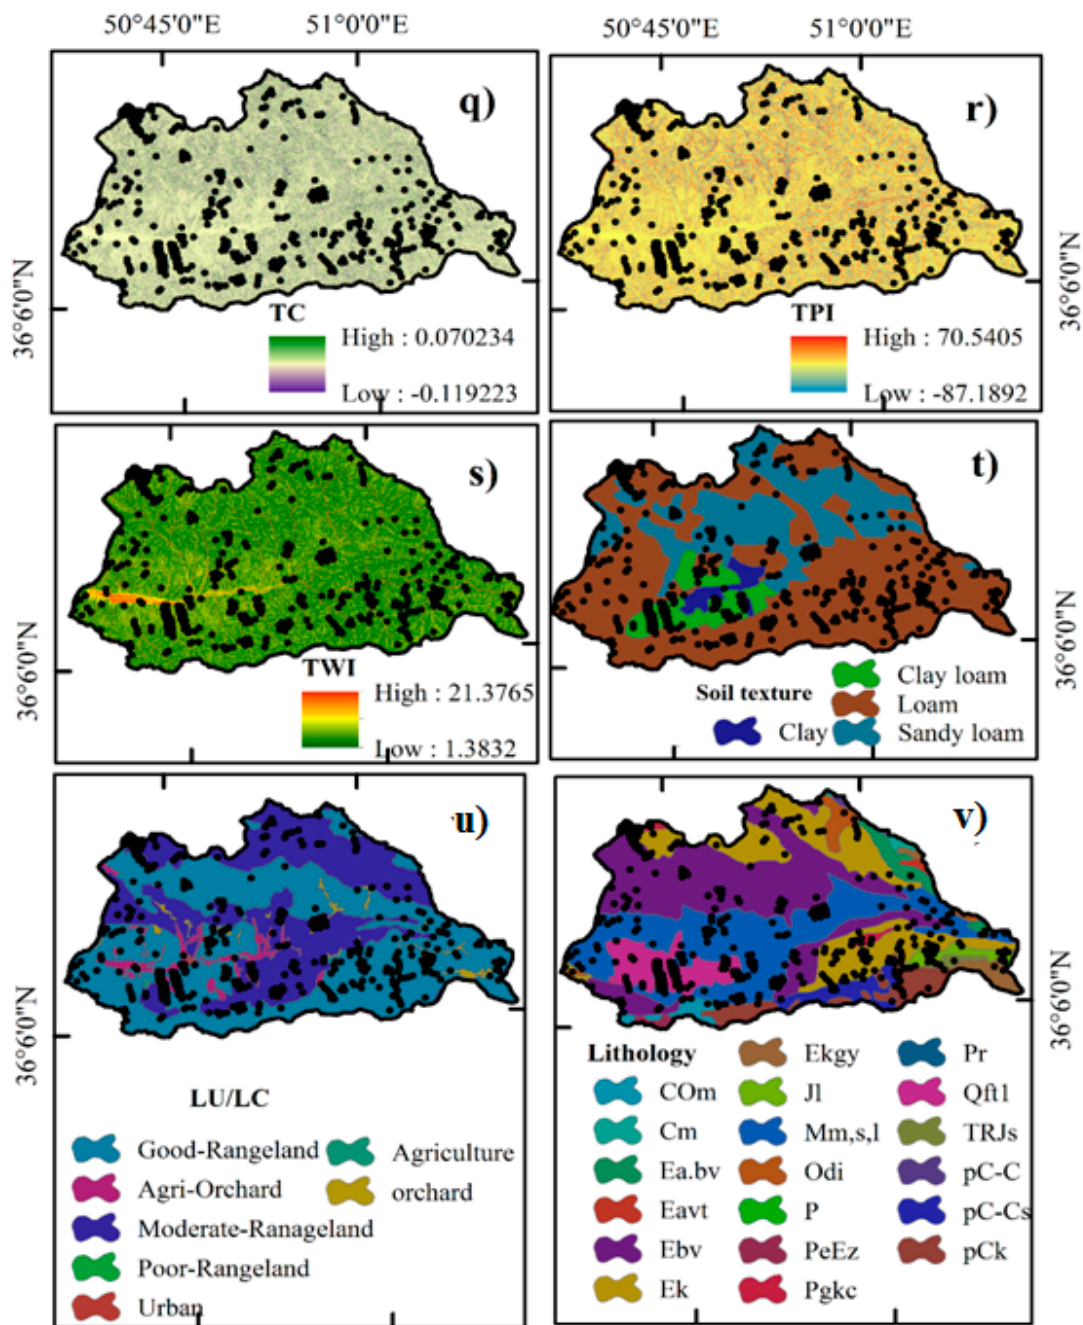

**Figure S1.** Landslide points and several landslide conditioning factors a) convergence index (CI), b) cross-sectional curvature (CSC), c) curvature, d) distance to stream (DtS), e) drainage density (DD), f) elevation, g) distance to fault (DtF), h), distance to road (DtR), i) flow accumulation (FA), j) longitudinal curvature (LC), k) plan curvature (PC), l) profile curvature (PrC), m) rainfall, n) slope, o) stream power index (SPI), p) surface area (SA), q) Tangential curvature (TC), r) topography position index (TPI), s) topography wetness index (TWI), t) soil texture, u) land use/land cover (LU/LC). v) Lithology.
